# Supplementary material
Source: PubMed Central journal article supplement (PMC2963372)
Supplement: supp_M110.144014_supplemental_materials.pdf [file supp_M110.144014_supplemental_materials.pdf]

## **SUPPLEMENTAL MATERIALS**

### **Diversity of innate immune recognition mechanism for bacterial polymeric *meso*-diaminopimelic acid-type peptidoglycan in insects**

Yang Yu, Ji-Won Park, Hyun-Mi Kwon, Hyun-Ok Hwang, In-Hwan Jang, Akiko Masuda, Kenji Kurokawa, Hiroshi Nakayama, Won-Jae Lee, Naoshi Dohmae, Jinghai Zhang, and Bok Luel Lee\*

\* To whom correspondence should be addressed. E-mail: [brlee@pusan.ac.kr](mailto:brlee@pusan.ac.kr)

This file includes supplemental Table 1 and Figures S1 –S4.

**Table 1. Quantitative amino acid composition of the DAP-type PGs from *E. coli* and *B. subtilis***

| Amino acid          | Amino acid quantities /             | Normalized to                       |
|---------------------|-------------------------------------|-------------------------------------|
|                     | 1 $\mu$ g DAP-type PG (pmol)        | (Alanine=2.0)                       |
|                     | <i>E. coli</i> / <i>B. subtilis</i> | <i>E. coli</i> / <i>B. subtilis</i> |
| Diaminopimelic acid | 90.4 / 90.2                         | 1.1 / 1.1                           |
| Muramic acid        | 43.1 / 43.2                         | 0.5 / 0.5                           |
| Glucosamine         | 25.3 / 25.1                         | 0.3 / 0.3                           |
| Phenylalanine       | 2.5 / 2.1                           | 0.0 / 0.0                           |
| Cystenine           | 0.2 / 0.1                           | 0.0 / 0.0                           |
| Leucine             | 5.1 / 5.0                           | 0.1 / 0.1                           |
| Isoleucine          | 2.8 / 2.9                           | 0.0 / 0.0                           |
| Lysine              | 9.0 / 9.2                           | 0.1 / 0.1                           |
| Methionine          | 0 / 0                               | 0.0 / 0.0                           |
| Valine              | 3.6 / 3.8                           | 0.0 / 0.0                           |
| Tyrosine            | 1.6 / 1.1                           | 0.0 / 0.0                           |
| Glutamic acid       | 96.6 / 96.2                         | 1.2 / 1.2                           |
| Aspartic acid       | 7.6 / 7.1                           | 0.1 / 0.1                           |
| Alanine             | 160.9 / 161.1                       | 2.0 / 2.0                           |
| Proline             | 1.8 / 2.1                           | 0.0 / 0.0                           |
| Threonine           | 2.4 / 2.5                           | 0.0 / 0.0                           |
| Glycine             | 8.2 / 8.1                           | 0.1 / 0.1                           |
| Serine              | 6.5 / 6.3                           | 0.1 / 0.1                           |
| Histidine           | 0.8 / 0.6                           | 0.0 / 0.0                           |
| Arginine            | 7.4 / 7.1                           | 0.1 / 0.1                           |

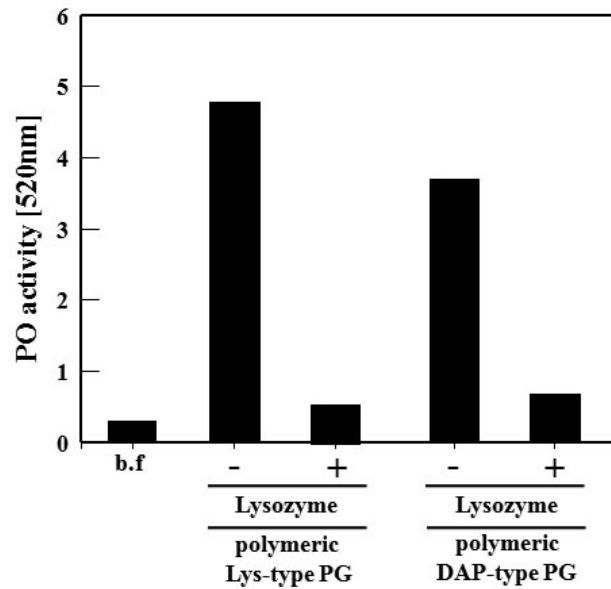

**Figure S1. Measurements of PO activities by lysozyme treated-polymeric Lys-type and DAP-type-PGs in *Tenebrio* hemolymph.** To measure PO activity, 30  $\mu$ l of crude hemolymph (150  $\mu$ g of proteins) was preincubated in 85  $\mu$ l of 20 mM Tris-HCl buffer (pH 8.0) containing 1  $\mu$ g of polymeric PGs or lysozyme-treated PGs for 10 min at 30°C, and then 400  $\mu$ l of substrate solution (1 mM 4-methylcatechol, 2 mM 4-hydroxyproline ethylester in 20 mM Tris-HCl buffer, pH 8.0, containing 5 mM CaCl<sub>2</sub>) was added to the reaction mixture. After incubation at 30°C for 10 min, the increase in absorbance at 520 nm was measured using a Shimadzu spectrophotometer. One unit of PO activity was defined as the amount of enzyme causing an increase in absorbance of 0.1 at 520 nm per 10-min incubation ( $A_{520}/10$  min).

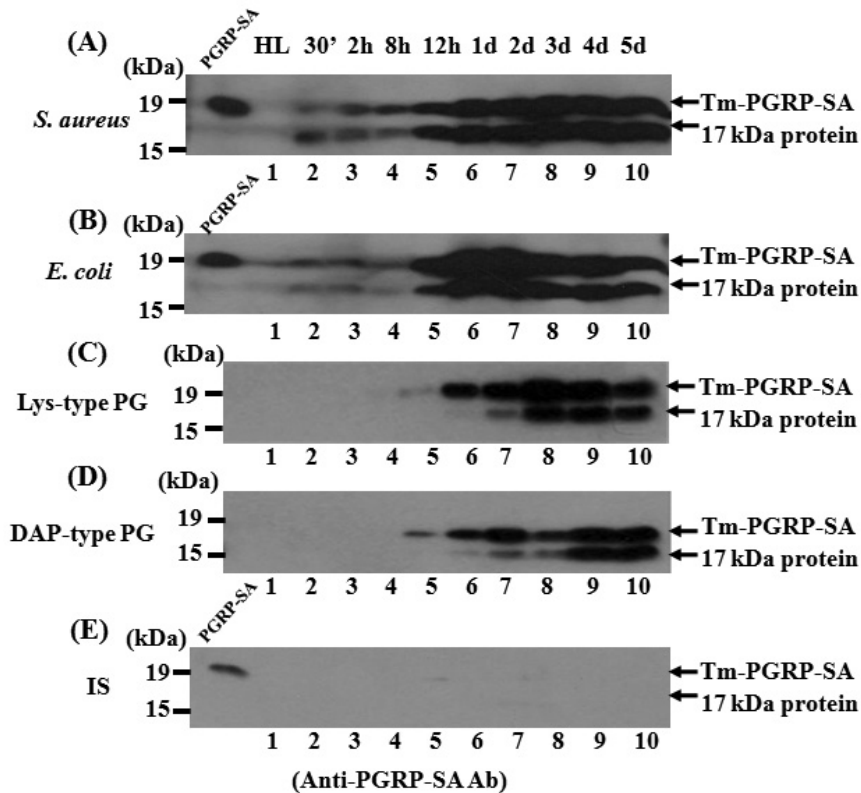

**Figure S2. The amounts of *Tenebrio* PGRP-SA and 17-kDa protein in the hemolymph increased after injection of bacteria and PGs.**

(A), (B), (C), (D) and (E) represent the Western blot analyses by using anti-PGRP-SA antibody after injection of *S. aureus* ( $2 \times 10^6$  cells/larva), *E. coli* ( $2 \times 10^6$  cells/larva), polymeric *S. aureus* Lys-type PG (100 ng/larva), polymeric *E. coli* DAP-type PG (100 ng/larva) and insect saline (IS) (4  $\mu$ l), respectively. On indicated times, hemolymph was collected and then a portion (50  $\mu$ g of protein) of each sample was analyzed by immunoblotting using affinity-purified anti-*Tenebrio* PGRP-SA antibody.

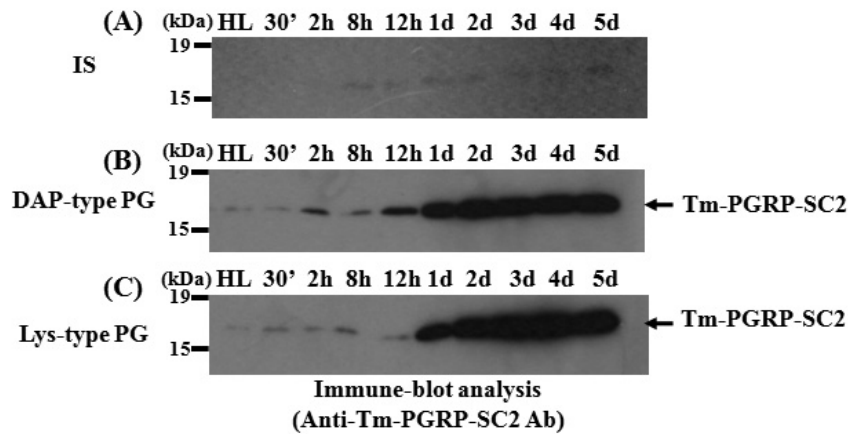

**Figure S3. The amounts of *Tenebrio* PGRP-SC2 in the hemolymph increased after injection of polymeric PGs.**

(A), (B) and (C) represent the Western blot analyses by using anti-PGRP-SC2 antibody after injection of insect saline (IS, 4  $\mu$ l), polymeric *S. aureus* Lys-type PG (100 ng/larva), and polymeric *E. coli* DAP-type PG (100 ng/larva), respectively. On indicated times, hemolymph was collected and then a portion (50  $\mu$ g protein) of each sample was analyzed by immunoblotting using affinity-purified anti-*Tenebrio* PGRP-SC2 antibody.

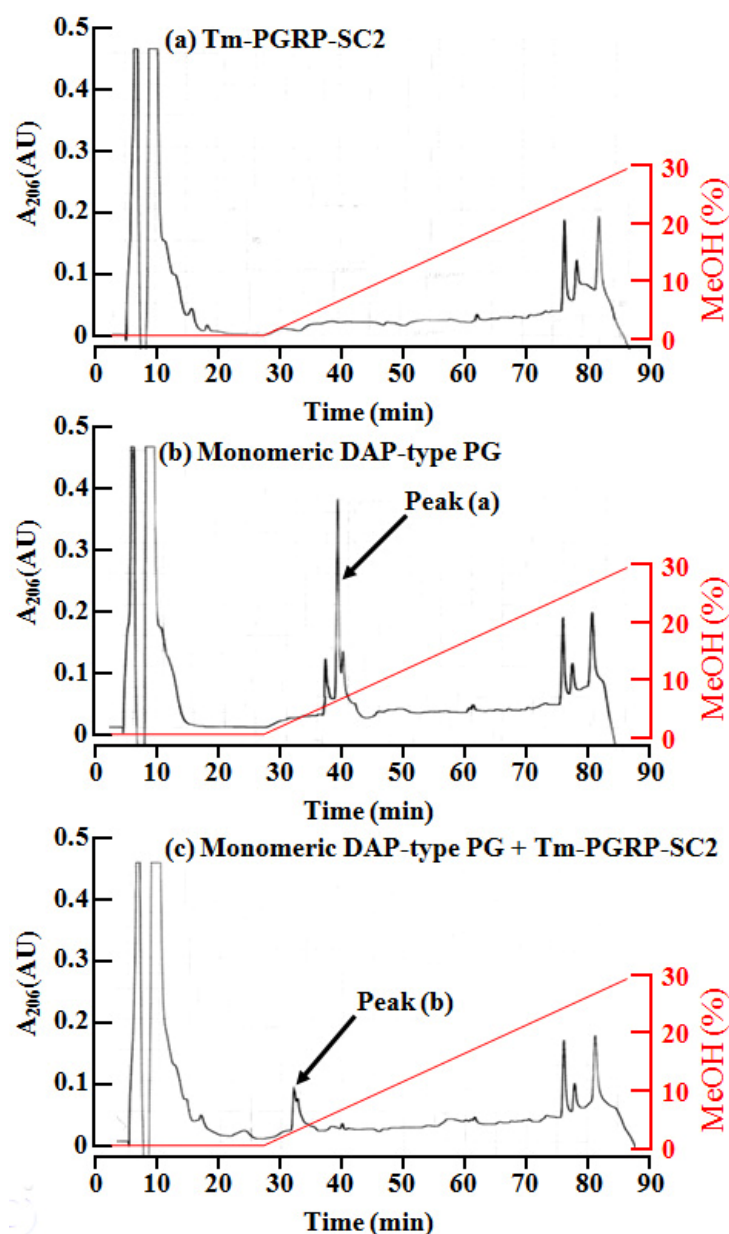

**Figure S4. HPLC elution patterns of lysozyme-treated DAP-type PG and PGRP-SC2-treated monomeric DAP-type PG.** (A), (B) and (C) represent the elution profile after injection of *Tenebrio* PGRP-SC2, the reaction mixture of lysozyme-treated DAP-type and the reaction mixture of PGRP-SC2 and peak (a), respectively. Polymeric DAP-type PG (600  $\mu$ g) and lysozyme (100  $\mu$ g) were incubated for 16 h at 37°C and then the supernatant was fractionated using a Hydrosphere C18 (4.6 x 250 mm I.D.) column with methanol gradient (shown on the *right-hand side*). The major peak (peak a) was again incubated with recombinant PGRP-SC2 (10  $\mu$ g) for 6 h at 30°C. The mixture was again injected to the same HPLC column and then peak (peak b) was collected and then analyzed by Edman reaction on the automatic amino acid sequencer.
